# Supplementary material for: Depolymerization of PMMA-Based Dental Resin Scraps on Different Production Scales
Source: MDPI journal article supplement (doi:10.3390/en17051196), 2024-03-02
Supplement: s1 [file s1]

**Table S1.** Class of compounds, sum of peak areas, chemistry registry numbers (CAS), and retention times of molecules identified by gas chromatography–mass spectrometry (GC-MS) in the liquid phase for depolymerization of PMMA based dental resins fragments/residues at 425 °C, atmospheric pressure and reaction times of 20, 30, 40, 50, and 60 minutes, on the technical scale.

| [min] | Class of chemical compounds                                                  | RT [min] | CAS     | $\Sigma$ (Area.%)         |
|-------|------------------------------------------------------------------------------|----------|---------|---------------------------|
| 20    | <b>Esters of Acrylic Acids</b><br>Methyl methacrylate<br>$\Sigma$ (Área.%) = | 3.659    | 80-62-6 | 100.000<br><b>100.000</b> |
| 30    | <b>Esters of Acrylic Acids</b><br>Methyl methacrylate<br>$\Sigma$ (Área.%) = | 3.658    | 80-62-6 | 100.000<br><b>100.000</b> |
| 40    | <b>Esters of Acrylic Acids</b><br>Methyl methacrylate<br>$\Sigma$ (Área.%) = | 3.661    | 80-62-6 | 100.000<br><b>100.000</b> |
| 50    | <b>Esters of Acrylic Acids</b><br>Methyl methacrylate<br>$\Sigma$ (Área.%) = | 3.653    | 80-62-6 | 100.000<br><b>100.000</b> |
| 60    | <b>Esters of Acrylic Acids</b><br>Methyl methacrylate<br>$\Sigma$ (Área.%) = | 3.654    | 80-62-6 | 100.000<br><b>100.000</b> |

**Table S2.** Class of compounds, sum of peak areas, chemistry registry numbers (CAS) and retention times of molecules identified by gas chromatography-mass spectrometry (GC-MS) in the liquid phase for depolymerization of PMMA based dental resins fragments/residues at 450 °C, atmospheric pressure and reaction times of 30, 40, 50 and 60 min, on the technical scale.

| [min] | Class of chemical compounds    | RT [min] | CAS      | *+<br>(Area.%) |
|-------|--------------------------------|----------|----------|----------------|
| 20    | <b>Esters of Acrylic Acids</b> |          |          |                |
|       | Methyl methacrylate            | 3.658    | 80-62-6  | 100.000        |
|       | <b>Σ (Area.%) =</b>            |          |          | <b>100.000</b> |
| 30    | <b>Esters of Acrylic Acids</b> |          |          |                |
|       | Methyl methacrylate            | 3.658    | 80-62-6  | 100.000        |
|       | <b>Σ (Area.%) =</b>            |          |          | <b>100.000</b> |
| 40    | <b>Esters of Acrylic Acids</b> |          |          |                |
|       | Methyl methacrylate            | 3.646    | 80-62-6  | 100.000        |
|       | <b>Σ (Area.%) =</b>            |          |          | <b>100.000</b> |
| 50    | <b>Esters of Acrylic Acids</b> |          |          |                |
|       | Methyl isobutyrate             | 3.317    | 547-63-7 | 4.696          |
|       | Methyl methacrylate            | 3.653    | 80-62-6  | 90.773         |
|       | <b>Σ (Area.%) =</b>            |          |          | <b>95.469</b>  |
|       | <b>Hydrocarbons</b>            |          |          |                |
|       | Toluene                        | 4.593    | 108-88-3 | 4.531          |
|       | <b>Σ (Area.%) =</b>            |          |          | <b>4.531</b>   |
| 60    | <b>Esters of Acrylic Acids</b> |          |          |                |
|       | Methyl isobutyrate             | 3.299    | 547-63-7 | 4.663          |
|       | Methyl methacrylate            | 3.648    | 80-62-6  | 59.611         |
|       | <b>Σ (Area.%) =</b>            |          |          | <b>64.274</b>  |
|       | <b>Hydrocarbons</b>            |          |          |                |
|       | Toluene                        | 4.552    | 108-88-3 | 12.384         |
|       | o-Xylene                       | 6.442    | 95-47-6  | 7.185          |
|       | Mesitylene                     | 8.315    | 108-67-8 | 4.243          |
|       | Naphthalene                    | 12.323   | 91-20-3  | 3.652          |
|       | <b>Σ (Area.%) =</b>            |          |          | <b>27.464</b>  |
|       | <b>NIC</b>                     |          |          |                |
|       | <b>Σ (Area.%) =</b>            |          |          | <b>8.262</b>   |

NIC = Non identified compounds.

**Table S3.** Class of compounds, sum of peak areas, chemistry registry numbers (CAS) and retention times of molecules identified by gas chromatography–mass spectrometry (GC-MS) in the liquid phase for depolymerization of PMMA based dental resins fragments/residues at 475 °C, atmospheric pressure and reaction times of 20, 30, 40, 50 and 60 min, on the technical scale.

| [min] | Class of chemical compounds    | RT [min] | CAS      | * <sub>i</sub><br>(Area.%) |
|-------|--------------------------------|----------|----------|----------------------------|
| 20    | <b>Esters of Acrylic Acids</b> |          |          |                            |
|       | Methyl methacrylate            | 3.665    | 80-62-6  | 100.000                    |
|       | <b>Σ (Área.%) =</b>            |          |          | <b>100.000</b>             |
| 30    | <b>Esters of Acrylic Acids</b> |          |          |                            |
|       | Methyl methacrylate            | 3.665    | 80-62-6  | 100.000                    |
|       | <b>Σ (Área.%) =</b>            |          |          | <b>100.000</b>             |
| 40    | <b>Esters of Acrylic Acids</b> |          |          |                            |
|       | Methyl isobutyrate             | 3.304    | 547-63-7 | 3.605                      |
|       | Methyl methacrylate            | 3.659    | 80-62-6  | 92.771                     |
|       | <b>Σ (Área.%) =</b>            |          |          | <b>96.376</b>              |
|       | <b>Hydrocarbons</b>            |          |          |                            |
| 40    | Toluene                        | 4.615    | 108-88-3 | 3.624                      |
|       | <b>Σ (Área.%) =</b>            |          |          | <b>3.624</b>               |
| 50    | <b>Esters of Acrylic Acids</b> |          |          |                            |
|       | Methyl isobutyrate             | 3.299    | 547-63-7 | 3.893                      |
|       | Methyl methacrylate            | 3.659    | 80-62-6  | 53.480                     |
|       | <b>Σ (Área.%) =</b>            |          |          | <b>57.373</b>              |
|       | <b>Hydrocarbons</b>            |          |          |                            |
|       | Toluene                        | 4.552    | 108-88-3 | 10.792                     |
|       | o-Xylene                       | 6.429    | 95-47-6  | 6.163                      |
|       | p-Xylene                       | 6.870    | 106-42-3 | 2.092                      |
|       | Mesitylene                     | 8.300    | 108-67-8 | 2.853                      |
|       | 1,2,3 trimethylbenzene         | 8.798    | 526-73-8 | 3.196                      |
|       | Naphthalene                    | 12.357   | 91-20-3  | 2.438                      |
|       | <b>Σ (Area.%) =</b>            |          |          | <b>27.533</b>              |
|       | <b>NIC</b>                     |          |          |                            |
|       | <b>Σ (Area.%) =</b>            |          |          | <b>15.094</b>              |
| 60    | <b>Esters of Acrylic Acids</b> |          |          |                            |
|       | Methyl isobutyrate             | 3.299    | 547-63-7 | 3.153                      |
|       | Methyl methacrylate            | 3.648    | 80-62-6  | 36.998                     |
|       | <b>Σ (Área.%) =</b>            |          |          | <b>40.151</b>              |
|       | <b>Hydrocarbons</b>            |          |          |                            |
|       | Toluene                        | 4.546    | 108-88-3 | 10.775                     |
|       | o-Xylene                       | 6.423    | 95-47-6  | 7.400                      |
|       | p-Xylene                       | 6.864    | 106-42-3 | 2.595                      |
|       | Mesitylene                     | 8.294    | 108-67-8 | 3.592                      |
|       | 1,2,3 trimethylbenzene         | 8.780    | 526-73-8 | 4.611                      |
|       | Naphthalene                    | 12.282   | 91-20-3  | 1.926                      |
|       | <b>Σ (Area.%) =</b>            |          |          | <b>30.899</b>              |
|       | <b>Esters of Benzoic Acids</b> |          |          |                            |
|       | Methyl benzoate                | 10.714   | 93-58-3  | 2.406                      |

|  |                     |        |
|--|---------------------|--------|
|  | $\Sigma$ (Area.%) = | 2.406  |
|  | NIC                 |        |
|  | $\Sigma$ (Area.%) = | 26,544 |

NIC = Non identified compounds.

**Table S4.** Class of compounds, sum of peak areas, chemistry registry numbers (CAS) and retention times of molecules identified by gas chromatography–mass spectrometry (GC-MS) in the liquid phase for depolymerization of PMMA based dental resin fragments/residues at 450 °C, atmospheric pressure and reaction times of 40, 50, 60, 70, 80, 90 and 100 min, on the pilot scale.

| [min] | Class of chemical compounds                                                    | RT [min] | CAS       | $\Sigma_i$<br>(Area.%) |
|-------|--------------------------------------------------------------------------------|----------|-----------|------------------------|
| 40    | <b>Esters of Acrylic Acids</b>                                                 |          |           |                        |
|       | Methyl methacrylate<br>$\Sigma$ (Área.%) =                                     | 3.670    | 80-62-6   | 100.000<br>100.000     |
| 50    | <b>Esters of Acrylic Acids</b>                                                 |          |           |                        |
|       | Methyl methacrylate<br>$\Sigma$ (Área.%) =                                     | 3.669    | 80-62-6   | 100.000<br>100.000     |
| 60    | <b>Esters of Acrylic Acids</b>                                                 |          |           |                        |
|       | Methyl methacrylate                                                            | 3.672    | 80-62-6   | 98.194                 |
|       | Methyl isobutyrate                                                             | 3.321    | 547-63-7  | 1.806                  |
|       | $\Sigma$ (Área.%) =                                                            |          |           | 100.000                |
| 70    | <b>Esters of Acrylic Acids</b>                                                 |          |           |                        |
|       | Methyl methacrylate<br>$\Sigma$ (Área.%) =                                     | 3.668    | 80-62-6   | 95.553<br>95.553       |
|       | <b>Esters of Methacrylic/Carboxylic Acids</b>                                  |          |           |                        |
|       | Ethylene glycol dimethacrylate                                                 | 14.003   | 97-90-5   | 2.643                  |
|       | Hexanedioic acid, 2-methyl-5-methylene-, dimethyl ester<br>$\Sigma$ (Área.%) = | 14.228   | 4513-62-6 | 1.804<br>4.447         |
| 80    | <b>Esters of Acrylic Acids</b>                                                 |          |           |                        |
|       | Methyl methacrylate<br>$\Sigma$ (Área.%) =                                     | 3.667    | 80-62-6   | 95.814<br>95.814       |
|       | <b>Esters of Methacrylic/Carboxylic Acids</b>                                  |          |           |                        |
|       | Ethylene glycol dimethacrylate                                                 | 14.004   | 97-90-5   | 1.999                  |
|       | Hexanedioic acid, 2-methyl-5-methylene-, dimethyl ester<br>$\Sigma$ (Área.%) = | 14.228   | 4513-62-6 | 2.187<br>4.186         |
| 90    | <b>Esters of Acrylic Acids</b>                                                 |          |           |                        |
|       | Methyl isobutyrate                                                             | 3.299    | 547-63-7  | 3.893                  |
|       | Methyl methacrylate<br>$\Sigma$ (Área.%) =                                     | 3.659    | 80-62-6   | 53.480<br>57.373       |
|       | <b>Hydrocarbons</b>                                                            |          |           |                        |
|       | Toluene                                                                        | 4.552    | 108-88-3  | 10.792                 |
|       | o-Xylene                                                                       | 6.429    | 95-47-6   | 6.163                  |
|       | p-Xylene                                                                       | 6.870    | 106-42-3  | 2.092                  |
|       | Mesitylene                                                                     | 8.300    | 108-67-8  | 2.853                  |
|       | 1,2,3 trimethylbenzene                                                         | 8.798    | 526-73-8  | 3.196                  |
|       | Naphthalene                                                                    | 12.357   | 91-20-3   | 2.438                  |
|       | $\Sigma$ (Area.%) =                                                            |          |           | 27.533                 |
|       | <b>NIC</b>                                                                     |          |           |                        |
|       | $\Sigma$ (Area.%) =                                                            |          |           | 15.094                 |

|     |                                |        |          |               |
|-----|--------------------------------|--------|----------|---------------|
| 100 | <b>Esters of Acrylic Acids</b> |        |          |               |
|     | Methyl isobutyrate             | 3.299  | 547-63-7 | 3.153         |
|     | Methyl methacrylate            | 3.648  | 80-62-6  | 36.998        |
|     | <b>Σ (Area.%) =</b>            |        |          | <b>40.151</b> |
|     | <b>Hydrocarbons</b>            |        |          |               |
|     | Toluene                        | 4.546  | 108-88-3 | 10.775        |
|     | o-Xylene                       | 6.423  | 95-47-6  | 7.400         |
|     | p-Xylene                       | 6.864  | 106-42-3 | 2.595         |
|     | Mesitylene                     | 8.294  | 108-67-8 | 3.592         |
|     | 1,2,3 trimethylbenzene         | 8.780  | 526-73-8 | 4.611         |
|     | Naphthalene                    | 12.282 | 91-20-3  | 1.926         |
|     | <b>Σ (Area.%) =</b>            |        |          | <b>30.899</b> |
|     | <b>Esters of Benzoic Acids</b> |        |          |               |
|     | Methyl benzoate                | 10.714 | 93-58-3  | 2.406         |
|     | <b>Σ (Area.%) =</b>            |        |          | <b>2.406</b>  |
|     | <b>NIC</b>                     |        |          |               |
|     | <b>Σ (Area.%) =</b>            |        |          | <b>26,544</b> |

NIC = Non identified compounds.

**Table S5.** Process conditions and programming of Chromatographic tests.

| Injection |                          |                  |                          |             |
|-----------|--------------------------|------------------|--------------------------|-------------|
| T(°C)     | Flow (mL/min)            | Split            | Heating rate<br>(°C/min) | Volume (μL) |
| 250       | 6.0                      | 1:50             | 10                       | 1.0         |
| Oven      |                          |                  |                          |             |
| T (°C)    | Heating rate<br>(°C/min) | Time<br>(min)    |                          |             |
| 60        | -                        | 1                |                          |             |
| 200       | 5                        | 2                |                          |             |
| 230       | 20                       | 10               |                          |             |
| 280       | 10                       | 39               |                          |             |
| Detector  |                          |                  |                          |             |
| T (°C)    | Carrier Gas              | Flow<br>(mL/min) | Quadrupole T<br>(°C)     |             |
|           | He                       | 30               | 150                      |             |
